# Supplementary material for: Assessing economic impacts of future GLOFs in Nepal's Everest region under different SSP scenarios using three-dimensional simulations
Source: Copernicus journal article supplement (doi:10.5194/nhess-25-3779-2025), 2025-10-06
Supplement: Supplementary file 3 [file Supplementary Table S2.xlsx]

## Sheet: Sheet1
Glacier_ID	SSP_Scenario	Year	Breach_Scenario	Agriculture_area	Agriculture_depth	Agriculture_damage	Buildings_count	Buildings_depth	buildings_damage	Roads_length	Roads_depth	Roads_damage
03366	585	2100	br3	0.97	10.8	90.1	998	8.7	2.1	103.13	8.5	79.2
03366	585	2080	br3	0.93	11	91.3	756	11	1.8	84.16	9.4	85
03366	245	2100	br3	0.93	10.8	91.3	755	10.8	1.8	83	9.5	84.8
03366	585	2100	br2	0.85	7.9	88.5	735	7.7	1.7	79.78	7.1	79.2
03366	585	2060	br3	0.88	9.3	81.7	724	9.4	1.6	76.75	9.2	82.1
03366	245	2080	br3	0.88	9.2	81.5	724	9.3	1.6	76.6	9.3	82.1
03366	585	2080	br2	0.85	6.9	80	711	7.1	1.6	73.49	7.4	80.5
03366	245	2100	br2	0.85	6.7	78.9	710	6.8	1.6	73.36	7.2	79
03366	585	2040	br3	0.81	7.8	76.1	703	7.6	1.5	73.18	8.4	81.7
03366	585	2100	br1	0.74	3.1	60	656	3.1	1.1	64.86	3.9	65.9
03366	585	2060	br2	0.71	5.7	67.9	617	4.8	1.1	64.97	6.5	76.7
03366	245	2080	br2	0.57	7.1	77.3	552	5	0.9	61.35	7	75.5
03366	585	2080	br1	0.54	3.1	59.2	546	2.3	0.7	57.17	3.7	62.7
03366	245	2100	br1	0.54	3	58.3	527	2.4	0.7	56.9	3.6	61.5
03366	585	2040	br2	0.56	6.6	84.2	515	4.6	0.9	58.22	6.4	74.4
03366	245	2060	br3	0.46	10.7	85.8	325	10.5	0.6	52.46	9.2	80.6
03366	585	2060	br1	0.4	3.5	62.2	265	3.2	0.4	42.28	3.6	61.2
03366	245	2080	br1	0.41	3.5	62.2	261	3.2	0.4	41.68	3.6	62.3
03366	585	2040	br1	0.4	3.2	61.5	258	3	0.4	41.09	3.4	60.8
03366	245	2040	br3	0.38	13.4	99.7	238	12.4	0.6	39.79	11.4	90.8
03366	245	2060	br2	0.38	8.6	96.8	238	7.4	0.5	40.18	7.3	77.8
03366	245	2040	br2	0.38	8.8	97.2	238	7.1	0.5	39.79	7.2	77.8
03366	245	2060	br1	0.35	3.8	69.2	183	3.6	0.3	33.39	3.3	62
03366	245	2040	br1	0.35	3.7	69	183	3.5	0.3	33.16	3.3	62.3
03422	585	2100	br3	3.96	7.3	79.6	997	7.9	2	102.31	7.8	80.1
03422	245	2100	br3	3.46	6.8	77.5	842	8.4	1.7	82.78	8.6	86.1
03422	585	2100	br2	3.53	4.9	68.5	815	5.6	1.6	81.86	6.1	77.5
03422	585	2080	br3	3.1	5.4	68.6	751	7	1.5	78.32	7	79.7
03422	245	2100	br2	2.76	4.8	68.5	648	6.1	1.3	71.45	6.2	76.5
03422	585	2100	br1	2.63	2.7	52.2	604	3	1	66.24	3.6	64.7
03422	245	2080	br3	2.3	3.9	59.4	583	6.1	1.2	63.2	5.9	76.4
03422	585	2080	br2	2.53	3.7	62.3	581	5	1.1	67.11	4.9	70.6
03422	585	2060	br3	1.99	2.5	48.5	539	4.1	1	57.06	4.2	69.2
03422	585	2040	br3	1.95	2.3	47.4	534	3.8	0.9	56.07	3.9	66.6
03422	245	2080	br2	1.83	2.5	47.6	528	3.5	0.9	55.52	3.8	67.6
03422	245	2100	br1	2.17	2.5	49.4	523	2.9	0.8	57.59	3.5	64.3
03422	245	2060	br3	1.33	3.2	59.2	492	4.3	0.9	48.35	4.4	70.8
03422	245	2040	br3	1.32	2.9	56.7	486	4	0.9	47.7	4	67.6
03422	585	2080	br1	2.04	1.8	39.8	482	2.3	0.7	54.27	2.7	57.7
03422	585	2060	br2	1.59	1.7	38.7	461	2.5	0.7	50.02	2.7	57.5
03422	585	2040	br2	1.52	1.6	35.8	455	2.3	0.7	48.76	2.5	54.2
03422	245	2060	br2	1.2	1.9	42.6	440	2.6	0.7	44.42	2.7	55
03422	245	2040	br2	0	0.3	8	432	2.3	0.6	43.08	2.5	52.7
03422	245	2080	br1	1.31	1.3	31.7	419	1.7	0.5	45.16	1.9	48.7
03422	585	2060	br1	1.12	0.9	23.9	387	1.2	0.4	41.82	1.4	39
03422	585	2040	br1	1.1	0.9	23.3	381	1.2	0.4	41.61	1.3	37.5
03422	245	2060	br1	0.89	1	22.6	365	1.3	0.4	37.1	1.3	37
03422	245	2040	br1	0.88	0.9	21.9	359	1.2	0.4	36.83	1.3	36.1
03448	126	2040	br3	2.92	11.5	92.1	3142	7.5	5.6	137.18	7.7	78.3
03448	126	2040	br2	2.54	8.3	76.9	1989	7.1	3.8	100.63	6.4	75.9
03448	126	2040	br1	2.24	5.5	63	1699	4.9	3	88.45	4.2	63.8
03473	585	2100	br3	4.15	11.3	84.9	1419	11.3	2.2	129.94	10.7	83.6
03473	585	2100	br2	3.44	9.4	83.9	1042	8.6	2	96.33	8.8	82
03473	245	2100	br3	3.66	10.7	85.5	1024	10.9	1.7	95.68	10.5	85
03473	585	2080	br3	3.27	8.6	80.7	918	9.7	1.6	78.95	9.5	81.9
03473	245	2100	br2	2.75	7.5	76.3	777	8.2	1.5	65.62	8.8	84.7
03473	585	2100	br1	2.63	5.1	67.4	703	5	1.3	62.06	5.9	75.8
03473	585	2080	br2	2.34	6.4	73.8	680	7.5	1.4	60.11	7.6	81.5
03473	245	2080	br3	2.2	7.5	76.3	653	10.3	1.2	60.24	8.8	80.7
03473	585	2060	br3	1.8	5.5	68.9	553	8.6	1.2	49.01	7.2	83.8
03473	585	2040	br3	1.74	5.1	67.9	545	8	1.2	46.74	6.9	81.6
03473	245	2080	br2	1.69	5.3	68.4	536	7.6	1.1	47.71	7.2	82
03473	245	2060	br3	0.93	5.6	63.5	502	8.7	1.1	40.27	7.4	81.2
03473	245	2100	br1	1.84	4.4	65.2	499	5.2	1	51.14	5.1	71.6
03473	245	2040	br3	0.91	5.3	60.8	498	8.2	1	40.05	6.8	78.5
03473	585	2060	br2	1.36	3.7	56	480	5.6	1	43.08	5.2	74.4
03473	585	2080	br1	1.68	3.5	59.8	474	4.4	0.9	48.45	4.4	69.1
03473	585	2040	br2	1.41	3.3	53.9	451	4.7	0.9	40.92	4.5	72.4
03473	245	2080	br1	1.09	2.7	48	442	3.6	0.8	41.27	3.8	65.4
03473	245	2060	br2	0.55	4.2	65.5	419	6	0.9	34.12	5	74.5
03473	245	2040	br2	0.54	4.1	63.2	416	5.6	0.9	33.34	4.7	73.7
03473	585	2060	br1	1.11	1.9	40.9	408	2.6	0.6	38.17	2.7	57.1
03473	585	2040	br1	0.84	1.9	39.5	373	2.6	0.6	34.96	2.5	56.4
03473	245	2060	br1	0.45	2.4	46.7	357	2.8	0.6	29.56	2.5	54.8
03473	245	2040	br1	0.45	2.3	44.4	350	2.6	0.5	29.48	2.3	51.7
03743	585	2100	br3	3.55	8.9	83.8	1358	8.2	2.4	115.98	8.4	80.4
03743	585	2080	br3	3.36	8.1	79.5	1149	8.6	2.1	91.54	8.8	79.8
03743	245	2100	br3	3.39	8.2	79.4	1144	8.8	2	92.45	8.8	79.9
03743	585	2100	br2	3.15	6.1	73.4	1047	5.9	2	85.64	6.6	75.6
03743	245	2080	br3	2.47	7.9	78.1	925	9.3	1.7	78.85	8.7	79.5
03743	245	2100	br2	2.42	5.9	70.7	831	6.3	1.6	72.81	6.6	75.2
03743	585	2080	br2	2.39	5.8	70.3	828	6.3	1.6	72.3	6.6	75.5
03743	585	2060	br3	2.14	6.5	77.1	817	8.4	1.6	69.95	7.6	77.5
03743	585	2040	br3	2.11	6.5	75.1	815	8.1	1.6	69.62	7.4	79.6
03743	245	2040	br3	1.19	6.3	67.7	762	8	1.5	59.52	7.7	78.5
03743	245	2060	br3	1.19	6.4	68.4	758	8.1	1.5	59.79	7.7	77.7
03743	245	2080	br2	1.86	5.1	65.2	747	6.3	1.5	62.08	6.7	76.9
03743	585	2060	br2	1.57	4.2	60.1	705	5.2	1.4	58.79	5.7	74.8
03743	585	2040	br2	1.55	4.1	60.9	702	5.1	1.3	58.54	5.5	74.4
03743	585	2100	br1	2.12	3.3	55.7	696	3.1	1.1	63.46	3.8	65.9
03743	245	2040	br2	0.72	4.8	68.3	653	5.2	1.2	47.64	5.1	72.2
03743	245	2060	br2	0.72	4.7	66.8	650	5.3	1.2	47.89	5.1	73.2
03743	585	2080	br1	1.61	3.1	53.9	617	3.1	1	54.41	3.8	66.4
03743	245	2100	br1	1.62	3.1	54.6	614	3.2	1	54.55	3.8	66.4
03743	245	2080	br1	1.09	2.5	43.9	584	2.9	0.9	48.61	3.2	63.1
03743	585	2040	br1	0.98	2	39.2	555	2.3	0.8	45.53	2.6	57.5
03743	585	2060	br1	0.99	2	39.5	549	2.4	0.8	45.83	2.7	58
03743	245	2040	br1	0.59	2.1	40.8	532	2.3	0.7	39.9	2.4	52.7
03743	245	2060	br1	0.58	2.1	41.2	524	2.4	0.7	39.74	2.3	52.1
