# Supplementary material for: Assessing economic impacts of future GLOFs in Nepal's Everest region under different SSP scenarios using three-dimensional simulations
Source: Copernicus journal article supplement (doi:10.5194/nhess-25-3779-2025), 2025-10-06
Supplement: Supplementary file [file nhess-25-3779-2025-supplement-title-page.pdf › nhess-25-3779-2025-supplement-title-page.pdf]

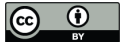

## *Supplement of*

# **Assessing economic impacts of future GLOFs in Nepal's Everest region under different SSP scenarios using three-dimensional simulations**

**Wilhelm Furian and Tobias Sauter**

*Correspondence to:* Wilhelm Furian ([wilhelm.furian.1@geo.hu-berlin.de](mailto:wilhelm.furian.1@geo.hu-berlin.de))

- [nhess-25-3779-2025-supplement-title-page.pdf](#)
- [Supplementary Figures.docx](#)
- [Supplementary Figures.pdf](#)
- [Supplementary Table S1.xlsx](#)
- [Supplementary Table S2.xlsx](#)
- [Supplementary Table S3.xlsx](#)

The copyright of individual parts of the supplement might differ from the article licence.
